# Supplementary material for: Bothrops moojeni Venom and Its Components Strongly Affect Osteoclasts’ Maturation and Protein Patterns
Source: MDPI journal article supplement (doi:10.3390/toxins13070459), 2021-06-30
Supplement: s1 [file s1]

# Supplementary Materials: *Bothrops moojeni* Venom and Its Components Strongly Affect Osteoclasts' Maturation and Protein Patterns

Fernanda D'Amélio, Hugo Vigerelli, Álvaro Rossan de Brandão Prieto-da-Silva, Eduardo Osório Frare, Isabel de Fátima Correia Batista, Daniel Carvalho Pimenta and Irina Kerkis

**Table S1.** Complete table of proteins identified by LC-MS.

| Positive Control   |              |          |          |                                                                  |
|--------------------|--------------|----------|----------|------------------------------------------------------------------|
| Accession          | Coverage (%) | Peptides | Avg Mass | Description                                                      |
| P02768 ALBU_HUMAN  | 63.21        | 3        | 69367    | Albumin                                                          |
| P01023 A2MG_HUMAN  | 34.89        | 1        | 163290   | Alpha-2-macroglobulin                                            |
| P20742 PZP_HUMAN   | 34.89        | 1        | 163862   | Pregnancy zone protein                                           |
| P61026 RAB10_HUMAN | 29.24        | 1        | 22541    | Ras-related protein Rab-10                                       |
| Q86TE4 LUZP2_HUMAN | 29.24        | 1        | 38958    | Leucine zipper protein 2                                         |
| Q5VZM2 RRAGB_HUMAN | 29.24        | 1        | 43250    | Ras-related GTP-binding protein B                                |
| Q13888 TF2H2_HUMAN | 29.24        | 1        | 44419    | General transcription factor IIH subunit 2                       |
| O43323 DHH_HUMAN   | 29.24        | 1        | 43577    | Desert hedgehog protein                                          |
| Q14623 IHH_HUMAN   | 29.24        | 1        | 45251    | Indian hedgehog protein                                          |
| Q15465 SHH_HUMAN   | 29.24        | 1        | 49607    | Sonic hedgehog protein                                           |
| Q8N118 CP4X1_HUMAN | 29.24        | 1        | 58875    | Cytochrome P450 4X1                                              |
| Q9NQV5 PRD11_HUMAN | 29.24        | 1        | 57863    | PR domain-containing protein 11                                  |
| P08582 TRFM_HUMAN  | 29.24        | 1        | 80215    | Melanotransferrin                                                |
| O95025 SEM3D_HUMAN | 29.24        | 1        | 89651    | Semaphorin-3D                                                    |
| Q12967 GNDS_HUMAN  | 29.24        | 1        | 100607   | Ral guanine nucleotide dissociation stimulator                   |
| Q9Y239 NOD1_HUMAN  | 29.24        | 1        | 107691   | Nucleotide-binding oligomerization domain-containing protein 1   |
| Q15147 PLCB4_HUMAN | 29.24        | 1        | 134463   | 1-phosphatidylinositol 4,5-bisphosphate phosphodiesterase beta-4 |
| Q92797 SYMPK_HUMAN | 29.24        | 1        | 141148   | Symplekin                                                        |
| Q709C8 VP13C_HUMAN | 29.24        | 1        | 422393   | Vacuolar protein sorting-associated protein 13C                  |
| O43422 P52K_HUMAN  | 25.26        | 1        | 87704    | 52 kDa repressor of the inhibitor of the protein kinase          |
| Q9BZ29 DOCK9_HUMAN | 25.26        | 1        | 236444   | Dedicator of cytokinesis protein 9                               |
| O00370 LORF2_HUMAN | 23.93        | 1        | 149011   | LINE-1 retrotransposable element ORF2 protein                    |
| Q96JQ0 PCD16_HUMAN | 23.93        | 1        | 346182   | Protocadherin-16                                                 |
| Q9UPA5 BSN_HUMAN   | 21.80        | 1        | 416475   | Protein bassoon                                                  |
| A6ND36 FA83G_HUMAN | 21.09        | 1        | 90835    | Protein FAM83G                                                   |
| Q9UKN7 MYO15_HUMAN | 39.19        | 3        | 395294   | Unconventional myosin-XV                                         |
| Q92817 EVPL_HUMAN  | 25.17        | 1        | 231602   | Envoplakin                                                       |
| Q9H098 F107B_HUMAN | 23.87        | 1        | 15558    | Protein FAM107B                                                  |
| P50052 AGTR2_HUMAN | 23.87        | 1        | 41184    | Type-2 angiotensin II receptor                                   |
| Q02750 MP2K1_HUMAN | 23.87        | 1        | 43439    | Dual specificity mitogen-activated protein kinase kinase 1       |

|                    |       |   |        |                                                                                    |
|--------------------|-------|---|--------|------------------------------------------------------------------------------------|
| Q15438 CYH1_HUMAN  | 23.87 | 1 | 46413  | Cytohesin-1 OS=Homo sapiens<br>OX=9606 GN=CYTH1 PE=1 SV=1                          |
| P38567 HYALP_HUMAN | 23.87 | 1 | 57848  | Hyaluronidase PH-20                                                                |
| Q5TIA1 MEI1_HUMAN  | 23.87 | 1 | 141161 | Meiosis inhibitor protein 1                                                        |
| O00443 P3C2A_HUMAN | 23.87 | 1 | 190678 | Phosphatidylinositol 4-phosphate<br>3-kinase C2 domain-containing<br>subunit alpha |
| O00763 ACACB_HUMAN | 23.87 | 1 | 276539 | Acetyl-CoA carboxylase 2                                                           |
| P29475 NOS1_HUMAN  | 23.09 | 1 | 160970 | Nitric oxide synthase, brain                                                       |
| Q8TD57 DYH3_HUMAN  | 23.09 | 1 | 470774 | Dynein heavy chain 3, axonemal                                                     |
| A7MD48 SRRM4_HUMAN | 23.01 | 1 | 68559  | Serine/arginine repetitive matrix<br>protein 4                                     |
| Q58FF3 ENPLL_HUMAN | 22.81 | 1 | 45859  | Putative endoplasmin-like protein                                                  |
| P14625 ENPL_HUMAN  | 22.81 | 1 | 92469  | Endoplasmin                                                                        |
| Q96A65 EXOC4_HUMAN | 22.81 | 1 | 110498 | Exocyst complex component 4                                                        |
| Q32MH5 F214A_HUMAN | 22.81 | 1 | 121670 | Protein FAM214A                                                                    |
| Q9Y618 NCOR2_HUMAN | 22.81 | 1 | 273654 | Nuclear receptor corepressor 2                                                     |
| Q8N7J2 AMER2_HUMAN | 21.05 | 1 | 69507  | APC membrane recruitment pro-<br>tein 2                                            |
| Q8NEV8 EXPH5_HUMAN | 21.05 | 1 | 222517 | Exophilin-5                                                                        |
| Q16787 LAMA3_HUMAN | 20.43 | 1 | 366650 | Laminin subunit alpha-3                                                            |
| Q14966 ZN638_HUMAN | 34.99 | 1 | 220623 | Zinc finger protein 638                                                            |
| Q9BXT5 TEX15_HUMAN | 34.99 | 1 | 315336 | Testis-expressed protein 15                                                        |
| Q96FA7 ZB6CL_HUMAN | 26.39 | 1 | 26352  | ZBED6 C-terminal-like protein                                                      |
| O95072 REC8_HUMAN  | 26.39 | 1 | 62614  | Meiotic recombination protein<br>REC8 homolog                                      |
| Q6UX68 XKR5_HUMAN  | 26.39 | 1 | 75014  | XK-related protein 5                                                               |
| Q9HB58 SP110_HUMAN | 26.39 | 1 | 78396  | Sp110 nuclear body protein                                                         |
| Q5VIR6 VPS53_HUMAN | 26.39 | 1 | 79653  | Vacuolar protein sorting-associated<br>protein 53 homolog                          |
| Q96K76 UBP47_HUMAN | 26.39 | 1 | 157311 | Ubiquitin carboxyl-terminal hy-<br>drolase 47                                      |
| O94813 SLIT2_HUMAN | 26.39 | 1 | 169869 | Slit homolog 2 protein                                                             |
| Q5T4S7 UBR4_HUMAN  | 26.39 | 1 | 573849 | E3 ubiquitin-protein ligase UBR4                                                   |
| O75436 VP26A_HUMAN | 23.45 | 1 | 38170  | Vacuolar protein sorting-associated<br>protein 26A                                 |
| Q2M3C7 SPKAP_HUMAN | 22.75 | 1 | 186455 | A-kinase anchor protein SPHKAP                                                     |
| P52743 ZN137_HUMAN | 21.84 | 1 | 24115  | Putative zinc finger protein 137                                                   |
| Q6AZW8 ZN660_HUMAN | 21.84 | 1 | 38270  | Zinc finger protein 660                                                            |
| Q5T5D7 ZN684_HUMAN | 21.84 | 1 | 43945  | Zinc finger protein 684                                                            |
| Q9ULI2 RIMKB_HUMAN | 21.84 | 1 | 42464  | Beta-citrylglutamate synthase B                                                    |
| O76081 RGS20_HUMAN | 21.84 | 1 | 43692  | Regulator of G-protein signaling 20                                                |
| B4DX44 ZN736_HUMAN | 21.84 | 1 | 49868  | Zinc finger protein 736                                                            |
| Q9UC06 ZNF70_HUMAN | 21.84 | 1 | 50802  | Zinc finger protein 70                                                             |
| O95219 SNX4_HUMAN  | 21.84 | 1 | 51909  | Sorting nexin-4                                                                    |
| Q9Y5X2 SNX8_HUMAN  | 21.84 | 1 | 52569  | Sorting nexin-8                                                                    |
| Q03924 ZN117_HUMAN | 21.84 | 1 | 56376  | Zinc finger protein 117                                                            |
| P49910 ZN165_HUMAN | 21.84 | 1 | 55771  | Zinc finger protein 165                                                            |
| Q96NJ6 ZFP3_HUMAN  | 21.84 | 1 | 57662  | Zinc finger protein 3 homolog                                                      |
| A2RRD8 ZN320_HUMAN | 21.84 | 1 | 59326  | Zinc finger protein 320                                                            |
| Q7Z3I7 ZN572_HUMAN | 21.84 | 1 | 61238  | Zinc finger protein 572                                                            |
| Q9BRR0 ZKSC3_HUMAN | 21.84 | 1 | 60641  | Zinc finger protein with KRAB and<br>SCAN domains 3                                |

|                    |       |   |        |                                                                  |
|--------------------|-------|---|--------|------------------------------------------------------------------|
| Q969J2 ZKSC4_HUMAN | 21.84 | 1 | 61579  | Zinc finger protein with KRAB and SCAN domains 4                 |
| Q5TEC3 ZN697_HUMAN | 21.84 | 1 | 60461  | Zinc finger protein 697                                          |
| P17098 ZNF8_HUMAN  | 21.84 | 1 | 64970  | Zinc finger protein 8                                            |
| Q8N184 ZN567_HUMAN | 21.84 | 1 | 75164  | Zinc finger protein 567                                          |
| Q96GC6 ZN274_HUMAN | 21.84 | 1 | 74177  | Neurotrophin receptor-interacting factor homolog                 |
| P17021 ZNF17_HUMAN | 21.84 | 1 | 77204  | Zinc finger protein 17                                           |
| P52740 ZN132_HUMAN | 21.84 | 1 | 80623  | Zinc finger protein 132                                          |
| Q96SZ4 ZSC10_HUMAN | 21.84 | 1 | 80387  | Zinc finger and SCAN domain-containing protein 10                |
| P78563 RED1_HUMAN  | 21.84 | 1 | 80763  | Double-stranded RNA-specific editase 1                           |
| Q14586 ZN267_HUMAN | 21.84 | 1 | 87376  | Zinc finger protein 267                                          |
| Q9ULD5 ZN777_HUMAN | 21.84 | 1 | 85176  | Zinc finger protein 777                                          |
| P57078 RIPK4_HUMAN | 21.84 | 1 | 91611  | Receptor-interacting serine/threonine-protein kinase 4           |
| Q8NDZ2 SIMC1_HUMAN | 21.84 | 1 | 96838  | SUMO-interacting motif-containing protein 1                      |
| O14827 RGRF2_HUMAN | 21.84 | 1 | 140764 | Ras-specific guanine nucleotide-releasing factor 2               |
| Q13972 RGRF1_HUMAN | 21.84 | 1 | 145233 | Ras-specific guanine nucleotide-releasing factor 1               |
| O43149 ZZEF1_HUMAN | 21.84 | 1 | 331075 | Zinc finger ZZ-type and EF-hand domain-containing protein 1      |
| Q9NYU1 UGGG2_HUMAN | 21.84 | 1 | 174734 | UDP-glucose:glycoprotein glucosyltransferase 2                   |
| Q9HCD6 TANC2_HUMAN | 21.84 | 1 | 219647 | Protein TANC2                                                    |
| Q6ZQO6 WDR87_HUMAN | 21.84 | 1 | 333185 | WD repeat-containing protein 87                                  |
| Q63HK3 ZKSC2_HUMAN | 21.77 | 1 | 110941 | Zinc finger protein with KRAB and SCAN domains 2                 |
| Q7Z2W7 TRPM8_HUMAN | 21.77 | 1 | 127685 | Transient receptor potential cation channel subfamily M member 8 |
| O95359 TACC2_HUMAN | 21.53 | 1 | 309426 | Transforming acidic coiled-coil-containing protein 2             |
| A6NJY1 SL9P1_HUMAN | 26.55 | 1 | 30828  | Putative SLC9B1-like protein SLC9B1P1                            |
| Q96EF9 ZHX1R_HUMAN | 26.55 | 1 | 33285  | Zinc fingers and homeobox protein 1, isoform 2                   |
| Q96TC7 RMD3_HUMAN  | 26.55 | 1 | 52118  | Regulator of microtubule dynamics protein 3                      |
| P98170 XIAP_HUMAN  | 26.55 | 1 | 56685  | E3 ubiquitin-protein ligase XIAP                                 |
| Q4ZJ14 SL9B1_HUMAN | 26.55 | 1 | 56054  | Sodium/hydrogen exchanger 9B1                                    |
| P26639 SYTC_HUMAN  | 26.55 | 1 | 83435  | Threonine--tRNA ligase, cytoplasmic                              |
| Q5T1R4 ZEP3_HUMAN  | 26.55 | 1 | 259462 | Transcription factor HIVEP3                                      |
| P31629 ZEP2_HUMAN  | 26.55 | 1 | 269051 | Transcription factor HIVEP2                                      |
| P15822 ZEP1_HUMAN  | 26.55 | 1 | 296863 | Zinc finger protein 40                                           |
| P22570 ADRO_HUMAN  | 22.62 | 1 | 53837  | NADPH:adrenodoxin oxidoreductase, mitochondrial                  |
| Q08188 TGM3_HUMAN  | 22.62 | 1 | 76632  | Protein-glutamine gamma-glutamyltransferase E                    |
| O95382 M3K6_HUMAN  | 22.62 | 1 | 142596 | Mitogen-activated protein kinase kinase 6                        |

|                    |       |   |        |                                                  |
|--------------------|-------|---|--------|--------------------------------------------------|
| Q8NGJ9 O51T1_HUMAN | 21.70 | 1 | 36998  | Olfactory receptor 51T1                          |
| P49221 TGM4_HUMAN  | 21.70 | 1 | 77145  | Protein-glutamine gamma-glutamyltransferase 4    |
| B5MCY1 TDR15_HUMAN | 21.70 | 1 | 221720 | Tudor domain-containing protein 15               |
| P13489 RINI_HUMAN  | 21.42 | 1 | 49974  | Ribonuclease inhibitor                           |
| B4DYI2 S31C2_HUMAN | 21.42 | 1 | 124429 | Putative spermatogenesis-associated protein 31C2 |
| P0DKV0 S31C1_HUMAN | 21.42 | 1 | 130522 | Putative spermatogenesis-associated protein 31C1 |
| Q5VVP1 S31A6_HUMAN | 21.42 | 1 | 147817 | Spermatogenesis-associated protein 31A6          |
| Q5VYP0 S31A3_HUMAN | 21.42 | 1 | 148706 | Spermatogenesis-associated protein 31A3          |
| Q8IWB4 S31A7_HUMAN | 21.42 | 1 | 148734 | Spermatogenesis-associated protein 31A7          |
| Q5TZJ5 S31A1_HUMAN | 21.42 | 1 | 148560 | Spermatogenesis-associated protein 31A1          |
| Q5VU36 S31A5_HUMAN | 21.42 | 1 | 148686 | Spermatogenesis-associated protein 31A5          |
| Q7Z2Z1 TICRR_HUMAN | 21.35 | 1 | 210855 | Treslin                                          |
| Q9C0G6 DYH6_HUMAN  | 21.35 | 1 | 475986 | Dynein heavy chain 6, axonemal                   |

#### Negative Control

| Acession           | Coverage (%) | Pep-tides | Avg Mass | Description                                                                  |
|--------------------|--------------|-----------|----------|------------------------------------------------------------------------------|
| Q9UKN7 MYO15_HUMAN | 39.19        | 1         | 395294   | Unconventional myosin-XV                                                     |
| Q92817 EVPL_HUMAN  | 25.17        | 0         | 231602   | Envoplakin                                                                   |
| Q9H098 F107B_HUMAN | 23.87        | 4         | 15558    | Protein FAM107B                                                              |
| P50052 AGTR2_HUMAN | 23.87        | 1         | 41184    | Type-2 angiotensin II receptor                                               |
| Q02750 MP2K1_HUMAN | 23.87        | 1         | 43439    | Dual specificity mitogen-activated protein kinase kinase 1                   |
| Q15438 CYH1_HUMAN  | 23.87        | 1         | 46413    | Cytohesin-1                                                                  |
| P38567 HYALP_HUMAN | 23.87        | 1         | 57848    | Hyaluronidase PH-20                                                          |
| Q5TIA1 MEI1_HUMAN  | 23.87        | 0         | 141161   | Meiosis inhibitor protein 1                                                  |
| O00443 P3C2A_HUMAN | 23.87        | 0         | 190678   | Phosphatidylinositol 4-phosphate 3-kinase C2 domain-containing subunit alpha |
| O00763 ACACB_HUMAN | 23.87        | 0         | 276539   | Acetyl-CoA carboxylase 2                                                     |
| P29475 NOS1_HUMAN  | 23.09        | 0         | 160970   | Nitric oxide synthase, brain                                                 |
| Q8TD57 DYH3_HUMAN  | 23.09        | 0         | 470774   | Dynein heavy chain 3, axonemal                                               |
| A7MD48 SRRM4_HUMAN | 23.01        | 1         | 68559    | Serine/arginine repetitive matrix protein 4                                  |
| Q58FF3 ENPLL_HUMAN | 22.81        | 1         | 45859    | Putative endoplasmic-like protein                                            |
| P14625 ENPL_HUMAN  | 22.81        | 1         | 92469    | Endoplasmic                                                                  |
| Q96A65 EXOC4_HUMAN | 22.81        | 1         | 110498   | Exocyst complex component 4                                                  |
| Q32MH5 F214A_HUMAN | 22.81        | 0         | 121670   | Protein FAM214A                                                              |
| Q9Y618 NCOR2_HUMAN | 22.81        | 0         | 273654   | Nuclear receptor corepressor 2                                               |
| Q8N7J2 AMER2_HUMAN | 21.05        | 1         | 69507    | APC membrane recruitment protein 2                                           |
| Q8NEV8 EXPH5_HUMAN | 21.05        | 0         | 222517   | Exophilin-5                                                                  |
| Q16787 LAMA3_HUMAN | 20.43        | 0         | 366650   | Laminin subunit alpha-3                                                      |

|                    |       |   |        |                                                         |
|--------------------|-------|---|--------|---------------------------------------------------------|
| A5PLK6 RGSL_HUMAN  | 24.91 | 0 | 125688 | Regulator of G-protein signaling protein-like           |
| Q86YW5 TRML1_HUMAN | 24.91 | 2 | 32679  | Trem-like transcript 1 protein                          |
| P29622 KAIN_HUMAN  | 24.91 | 1 | 48542  | Kallistatin                                             |
| Q9BQC3 DPH2_HUMAN  | 24.91 | 1 | 52083  | 2-(3-amino-3-carboxypropyl)histidine synthase subunit 2 |
| Q6ZNC8 MBOA1_HUMAN | 24.91 | 1 | 56557  | Lysophospholipid acyltransferase 1                      |
| Q6ZUJ8 BCAP_HUMAN  | 24.91 | 1 | 90398  | Phosphoinositide 3-kinase adapter protein 1             |
| O00206 TLR4_HUMAN  | 24.91 | 1 | 95680  | Toll-like receptor 4                                    |
| Q96PV7 F193B_HUMAN | 24.91 | 1 | 96543  | Protein FAM193B                                         |
| Q9BZ76 CNTP3_HUMAN | 24.91 | 0 | 140690 | Contactin-associated protein-like 3                     |
| Q96NU0 CNT3B_HUMAN | 24.91 | 0 | 140414 | Contactin-associated protein-like 3B                    |
| Q9ULH0 KDIS_HUMAN  | 24.91 | 0 | 196541 | Kinase D-interacting substrate of 220 kDa               |
| Q9HCM3 K1549_HUMAN | 24.91 | 0 | 210753 | UPF0606 protein KIAA1549                                |
| Q8IVV2 LOXH1_HUMAN | 24.91 | 0 | 235676 | Lipoxygenase homology domain-containing protein 1       |
| Q5T5X7 BEND3_HUMAN | 21.23 | 1 | 94475  | BEN domain-containing protein 3                         |
| Q8IWI9 MGAP_HUMAN  | 30.09 | 0 | 336160 | MAX gene-associated protein                             |
| Q8NG48 LINES_HUMAN | 24.28 | 1 | 85857  | Protein Lines homolog 1                                 |
| Q86UT6 NLRX1_HUMAN | 24.28 | 1 | 107616 | NLR family member X1                                    |
| P24311 COX7B_HUMAN | 23.01 | 6 | 9161   | Cytochrome c oxidase subunit 7B, mitochondrial          |
| Q8TF08 CX7B2_HUMAN | 23.01 | 6 | 9077   | Cytochrome c oxidase subunit 7B2, mitochondrial         |
| Q9NXE4 NSMA3_HUMAN | 23.01 | 1 | 97810  | Sphingomyelin phosphodiesterase 4                       |
| Q8WUM0 NU133_HUMAN | 23.01 | 0 | 128979 | Nuclear pore complex protein Nup133                     |
| Q504Q3 PAN2_HUMAN  | 23.01 | 0 | 135367 | PAN2-PAN3 deadenylation complex catalytic subunit PAN2  |
| Q6ZU69 F205A_HUMAN | 23.01 | 0 | 148095 | Protein FAM205A                                         |
| Q9UKK3 PARP4_HUMAN | 21.85 | 0 | 192593 | mono-ADP-ribosyltransferase PARP4                       |
| Q9GZV4 IF5A2_HUMAN | 21.58 | 3 | 16793  | Eukaryotic translation initiation factor 5A-2           |
| P63241 IF5A1_HUMAN | 21.58 | 3 | 16832  | Eukaryotic translation initiation factor 5A-1           |
| Q6IS14 IF5AL_HUMAN | 21.58 | 3 | 16773  | Eukaryotic translation initiation factor 5A-1-like      |
| P56749 CLD12_HUMAN | 21.58 | 2 | 27110  | Claudin-12                                              |
| Q66K74 MAP1S_HUMAN | 21.58 | 0 | 112211 | Microtubule-associated protein 1S                       |
| Q9NS87 KIF15_HUMAN | 20.50 | 0 | 160159 | Kinesin-like protein KIF15                              |
| Q96PG2 M4A10_HUMAN | 20.10 | 2 | 29747  | Membrane-spanning 4-domains subfamily A member 10       |
| O43422 P52K_HUMAN  | 20.10 | 1 | 87704  | 52 kDa repressor of the inhibitor of the protein kinase |

| Q15811 ITSN1_HUMAN      | 20.10        | 0        | 195420   | Intersectin-1                                                     |
|-------------------------|--------------|----------|----------|-------------------------------------------------------------------|
| Q9Y4F3 MARF1_HUMAN      | 20.10        | 0        | 192858   | Meiosis regulator and mRNA stability factor 1                     |
| Q92608 DOCK2_HUMAN      | 20.10        | 0        | 211947   | Dedicator of cytokinesis protein 2                                |
| <i>Bothrops moojeni</i> |              |          |          |                                                                   |
| Acession                | Coverage (%) | Peptides | Avg Mass | Description                                                       |
| P02768 ALBU_HUMAN       | 72.38        | 6        | 69367    | Albumin                                                           |
| P02787 TRFE_HUMAN       | 37.29        | 1        | 77064    | Serotransferrin                                                   |
| Q9UBC5 MYO1A_HUMAN      | 33.17        | 1        | 118401   | Unconventional myosin-Ia                                          |
| Q8N682 DRAM1_HUMAN      | 26.38        | 2        | 26253    | DNA damage-regulated autophagy modulator protein 1                |
| Q8N6G2 TEX26_HUMAN      | 26.38        | 2        | 33595    | Testis-expressed protein 26                                       |
| Q5T6L9 EMARD_HUMAN      | 26.38        | 1        | 77788    | Endoplasmic reticulum membrane-associated RNA degradation protein |
| P17948 VGFR1_HUMAN      | 26.38        | 0        | 150768   | Vascular endothelial growth factor receptor 1                     |
| Q9P219 DAPLE_HUMAN      | 26.38        | 0        | 228228   | Protein Daple                                                     |
| A2RRP1 NBAS_HUMAN       | 26.38        | 0        | 268569   | Neuroblastoma-amplified sequence                                  |
| Q6ZP29 LAAT1_HUMAN      | 25.74        | 2        | 31947    | Lysosomal amino acid transporter 1 homolog                        |
| Q96I82 KAZD1_HUMAN      | 25.74        | 2        | 32945    | Kazal-type serine protease inhibitor domain-containing protein 1  |
| Q99645 EPYC_HUMAN       | 25.74        | 2        | 36637    | Epiphycan                                                         |
| Q9HBL6 LRTM1_HUMAN      | 25.74        | 1        | 38171    | Leucine-rich repeat and transmembrane domain-containing protein 1 |
| Q8N3X6 LCORL_HUMAN      | 25.74        | 1        | 66964    | Ligand-dependent nuclear receptor corepressor-like protein        |
| Q12882 DPYD_HUMAN       | 25.74        | 0        | 111401   | Dihydropyrimidine dehydrogenase [NADP(+)]                         |
| Q29RF7 PDS5A_HUMAN      | 25.74        | 0        | 150830   | Sister chromatid cohesion protein PDS5 homolog A                  |
| O94813 SLIT2_HUMAN      | 25.74        | 0        | 169869   | Slit homolog 2 protein                                            |
| A6NKB5 PCX2_HUMAN       | 25.74        | 0        | 237275   | Pecanex-like protein 2                                            |
| Q92610 ZN592_HUMAN      | 21.42        | 0        | 137528   | Zinc finger protein 592                                           |
| Q9UIY3 RWD2A_HUMAN      | 38.26        | 3        | 33893    | RWD domain-containing protein 2A                                  |
| Q8NHG8 ZNR2_HUMAN       | 29.86        | 4        | 24115    | E3 ubiquitin-protein ligase ZNR2                                  |
| Q99996 AKAP9_HUMAN      | 29.73        | 0        | 452990   | A-kinase anchor protein 9                                         |
| P00748 FA12_HUMAN       | 27.17        | 1        | 67792    | Coagulation factor XII                                            |
| Q8NEP7 KLDC9_HUMAN      | 24.68        | 1        | 37754    | Kelch domain-containing protein 9                                 |
| Q6UY14 ATL4_HUMAN       | 24.68        | 0        | 116545   | ADAMTS-like protein 4                                             |
| Q92608 DOCK2_HUMAN      | 24.19        | 0        | 211947   | Dedicator of cytokinesis protein 2                                |
| Q5XG92 EST4A_HUMAN      | 23.30        | 1        | 63529    | Carboxylesterase 4A                                               |
| Q8N4P2 TT30B_HUMAN      | 23.30        | 1        | 76099    | Tetratricopeptide repeat protein 30B                              |

|                     |       |   |        |                                                            |
|---------------------|-------|---|--------|------------------------------------------------------------|
| Q86WT1 TT30A_HUMAN  | 23.30 | 1 | 76136  | Tetratricopeptide repeat protein 30A                       |
| Q6ZP29 LAAT1_HUMAN  | 22.64 | 2 | 31947  | Lysosomal amino acid transporter 1 homolog                 |
| Q99645 EPYC_HUMAN   | 22.64 | 2 | 36637  | Epiphycan                                                  |
| Q8N3X6 LCORL_HUMAN  | 22.64 | 1 | 66964  | Ligand-dependent nuclear receptor corepressor-like protein |
| Q9C099 LRCC1_HUMAN  | 22.64 | 0 | 119596 | OS=Homo sapiens OX=9606 GN=LRCC1 PE=1 SV=2                 |
| Q96RV3 PCX1_HUMAN   | 22.64 | 0 | 258673 | Pecanex-like protein 1                                     |
| Q5T4S7 UBR4_HUMAN   | 22.64 | 0 | 573849 | E3 ubiquitin-protein ligase UBR4                           |
| Q9BZE4 NOG1_HUMAN   | 22.24 | 1 | 73965  | Nucleolar GTP-binding protein 1                            |
| Q8IYB7 DI3L2_HUMAN  | 22.24 | 1 | 99279  | DIS3-like exonuclease 2                                    |
| Q9BRR8 GPTC1_HUMAN  | 21.89 | 1 | 103345 | G patch domain-containing protein 1                        |
| Q8IYWZ8 SUGP1_HUMAN | 21.89 | 1 | 72471  | SURP and G-patch domain-containing protein 1               |
| Q8N302 AGGF1_HUMAN  | 21.89 | 1 | 80977  | Angiogenic factor with G patch and FHA domains 1           |
| Q8IX01 SUGP2_HUMAN  | 21.89 | 0 | 120207 | SURP and G-patch domain-containing protein 2               |
| O75369 FLNB_HUMAN   | 21.85 | 0 | 278162 | Filamin-B                                                  |
| Q8WZ55 BSND_HUMAN   | 20.21 | 2 | 35197  | Barttin                                                    |
| O94854 K0754_HUMAN  | 20.21 | 0 | 135148 | Uncharacterized protein KI-AA0754                          |
| Q14008 CKAP5_HUMAN  | 20.21 | 0 | 225493 | Cytoskeleton-associated protein 5                          |
| Q86VR8 FJX1_HUMAN   | 20.16 | 1 | 48507  | Four-jointed box protein 1                                 |
| O60437 PEPL_HUMAN   | 33.84 | 1 | 204745 | Periplakin                                                 |
| Q13224 NMDE2_HUMAN  | 29.62 | 1 | 166367 | Glutamate receptor ionotropic, NMDA 2B                     |
| Q8NHG8 ZNR2_HUMAN   | 27.36 | 4 | 24115  | E3 ubiquitin-protein ligase ZNR2                           |
| P62805 H4_HUMAN     | 25.96 | 5 | 11367  | Histone H4                                                 |
| Q9Y320 TMX2_HUMAN   | 25.96 | 2 | 34038  | Thioredoxin-related transmembrane protein 2                |
| P20042 IF2B_HUMAN   | 25.96 | 2 | 38388  | Eukaryotic translation initiation factor 2 subunit 2       |
| Q6ZSC3 RBM43_HUMAN  | 25.96 | 1 | 40666  | RNA-binding protein 43                                     |
| Q96FI4 NEIL1_HUMAN  | 25.96 | 1 | 43684  | Endonuclease 8-like 1                                      |
| Q9Y4A0 JERKL_HUMAN  | 25.96 | 1 | 59912  | Jerky protein homolog-like                                 |
| Q9H078 CLPB_HUMAN   | 25.96 | 1 | 78729  | Caseinolytic peptidase B protein homolog                   |
| Q9UK96 FBX10_HUMAN  | 25.96 | 1 | 105195 | F-box only protein 10                                      |
| Q9UJF2 NGAP_HUMAN   | 25.96 | 0 | 128557 | Ras GTPase-activating protein nGAP                         |
| Q9HCH0 NCK5L_HUMAN  | 25.96 | 0 | 139013 | Nck-associated protein 5-like                              |
| Q13395 TARBP1_HUMAN | 25.96 | 0 | 181674 | Probable methyltransferase TARBP1                          |
| Q8NDH2 CC168_HUMAN  | 25.96 | 0 | 277949 | Coiled-coil domain-containing protein 168                  |
| H3BQW9 F229A_HUMAN  | 22.95 | 4 | 12972  | Protein FAM229A                                            |
| Q96LR7 CB050_HUMAN  | 22.95 | 3 | 17838  | Uncharacterized protein C2orf50                            |
| P22674 CCNO_HUMAN   | 22.95 | 1 | 38096  | Cyclin-O                                                   |

|                    |       |   |        |                                                                |
|--------------------|-------|---|--------|----------------------------------------------------------------|
| Q567U6 CCD93_HUMAN | 22.95 | 1 | 73198  | Coiled-coil domain-containing protein 93                       |
| Q12894 IFRD2_HUMAN | 22.95 | 1 | 54814  | Interferon-related developmental regulator 2                   |
| O14511 NRG2_HUMAN  | 22.95 | 1 | 91679  | Pro-neuregulin-2, membrane-bound isoform                       |
| O95714 HERC2_HUMAN | 22.95 | 0 | 527234 | E3 ubiquitin-protein ligase HERC2                              |
| Q9BXM0 PRAX_HUMAN  | 22.95 | 0 | 154904 | Periaxin                                                       |
| Q9Y4B5 MTCL1_HUMAN | 22.95 | 0 | 209525 | Microtubule cross-linking factor 1                             |
| Q9P0X4 CAC1I_HUMAN | 22.95 | 0 | 245101 | Voltage-dependent T-type calcium channel subunit alpha-1I      |
| P43652 AFAM_HUMAN  | 22.81 | 1 | 69069  | Afamin                                                         |
| P0C221 CC175_HUMAN | 22.72 | 1 | 93626  | Coiled-coil domain-containing protein 175                      |
| Q3KNW1 SNAI3_HUMAN | 22.48 | 2 | 32474  | Zinc finger protein SNAI3                                      |
| P51161 FABP6_HUMAN | 22.23 | 4 | 14371  | Gastrotropin                                                   |
| A6NC98 CC88B_HUMAN | 22.23 | 0 | 164808 | Coiled-coil domain-containing protein 88B                      |
| Q8IXQ8 PDZD9_HUMAN | 22.04 | 2 | 29904  | PDZ domain-containing protein 9                                |
| Q92599 SEPT8_HUMAN | 22.04 | 1 | 55756  | Septin-8                                                       |
| P27816 MAP4_HUMAN  | 22.04 | 0 | 121005 | Microtubule-associated protein 4                               |
| Q05C16 LRC63_HUMAN | 21.92 | 1 | 66309  | Leucine-rich repeat-containing protein 63                      |
| Q86VS8 HOOK3_HUMAN | 21.92 | 1 | 83126  | Protein Hook homolog 3                                         |
| Q6NUT2 D19L2_HUMAN | 21.92 | 1 | 87374  | Probable C-mannosyltransferase DPY19L2                         |
| Q14204 DYHC1_HUMAN | 21.92 | 0 | 532412 | Cytoplasmic dynein 1 heavy chain 1                             |
| A4UGR9 XIRP2_HUMAN | 21.92 | 0 | 382302 | Xin actin-binding repeat-containing protein 2                  |
| Q07890 SOS2_HUMAN  | 21.92 | 0 | 152978 | Son of sevenless homolog 2                                     |
| Q6ZR08 DYH12_HUMAN | 21.92 | 0 | 356942 | Dynein heavy chain 12, axonemal Protein                        |
| Q460N5 PAR14_HUMAN | 21.92 | 0 | 202799 | mono-ADP-ribosyltransferase PARP14                             |
| O15078 CE290_HUMAN | 21.92 | 0 | 290384 | Centrosomal protein of 290 kDa                                 |
| Q99996 AKAP9_HUMAN | 21.92 | 0 | 452990 | A-kinase anchor protein 9                                      |
| Q9UPU3 SORC3_HUMAN | 21.42 | 1 | 135755 | VPS10 domain-containing receptor SorCS3                        |
| O95150 TNF15_HUMAN | 21.32 | 3 | 28087  | Tumor necrosis factor ligand superfamily member 15             |
| P57057 G6PT2_HUMAN | 20.54 | 1 | 57648  | Glucose-6-phosphate exchanger SLC37A1                          |
| Q9H4Q3 PRD13_HUMAN | 20.54 | 1 | 73981  | PR domain zinc finger protein 13                               |
| Q96AQ6 PBIP1_HUMAN | 20.18 | 1 | 80643  | Pre-B-cell leukemia transcription factor-interacting protein 1 |
| P02765 FETUA_HUMAN | 39.47 | 5 | 39325  | Alpha-2-HS-glycoprotein                                        |
| Q7Z5K2 WAPL_HUMAN  | 20.55 | 1 | 132945 | Wings apart-like protein homolog                               |

| Q86WS5 TMPSC_HUMAN                       | 20.15        | 2        | 38605    | Transmembrane protease serine 12                                  |
|------------------------------------------|--------------|----------|----------|-------------------------------------------------------------------|
| <b>High mass <i>Bothrops moojeni</i></b> |              |          |          |                                                                   |
| Acession                                 | Coverage (%) | Peptides | Avg mass | Description                                                       |
| P24390 ERD21_HUMAN                       | 36.71        | 2        | 24542    | ER lumen protein-retaining receptor 1                             |
| Q7Z412 PEX26_HUMAN                       | 36.71        | 2        | 33898    | Peroxisome assembly protein 26                                    |
| Q969N4 TAAR8_HUMAN                       | 36.71        | 1        | 38029    | Trace amine-associated receptor 8                                 |
| P51686 CCR9_HUMAN                        | 36.71        | 1        | 42016    | C-C chemokine receptor type 9                                     |
| Q96P65 QRFP_R_HUMAN                      | 36.71        | 1        | 49488    | Pyroglutamylated RF-amide peptide receptor                        |
| Q2WGJ6 KLH38_HUMAN                       | 36.71        | 1        | 65541    | Kelch-like protein 38                                             |
| Q8WYR1 PI3R5_HUMAN                       | 36.71        | 1        | 97348    | Phosphoinositide 3-kinase regulatory subunit 5                    |
| O15228 GNPAT_HUMAN                       | 36.71        | 1        | 77188    | Dihydroxyacetone phosphate acyltransferase                        |
| P53675 CLH2_HUMAN                        | 36.71        | 0        | 187029   | Clathrin heavy chain 2                                            |
| Q14997 PSME4_HUMAN                       | 36.71        | 0        | 211332   | Proteasome activator complex subunit 4                            |
| Q6ZP29 LAAT1_HUMAN                       | 28.15        | 2        | 31947    | Lysosomal amino acid transporter 1 homolog                        |
| Q96I82 KAZD1_HUMAN                       | 28.15        | 2        | 32945    | Kazal-type serine protease inhibitor domain-containing protein 1  |
| Q99645 EPYC_HUMAN                        | 28.15        | 2        | 36637    | Epiphycan                                                         |
| Q9HBL6 LRTM1_HUMAN                       | 28.15        | 1        | 38171    | Leucine-rich repeat and transmembrane domain-containing protein 1 |
| Q8N3X6 LCORL_HUMAN                       | 28.15        | 1        | 66964    | Ligand-dependent nuclear receptor corepressor-like protein        |
| Q12882 DPYD_HUMAN                        | 28.15        | 0        | 111401   | Dihydropyrimidine dehydrogenase [NADP(+)]                         |
| Q29RF7 PDS5A_HUMAN                       | 28.15        | 0        | 150830   | Sister chromatid cohesion protein PDS5 homolog A                  |
| O94813 SLIT2_HUMAN                       | 28.15        | 0        | 169869   | Slit homolog 2 protein                                            |
| A6NKB5 PCX2_HUMAN                        | 28.15        | 0        | 237275   | Pecanex-like protein 2                                            |
| Q9H6B4 CLMP_HUMAN                        | 21.80        | 2        | 41281    | CXADR-like membrane protein                                       |
| Q9UPA5 BSN_HUMAN                         | 20.09        | 0        | 416475   | Protein bassoon                                                   |
| <b>Low Mass <i>Bothrops moojeni</i></b>  |              |          |          |                                                                   |
| Acession                                 | Coverage (%) | Peptides | Avg Mass | Description                                                       |
| P01023 A2MG_HUMAN                        | 40.46        | 1        | 163290   | Alpha-2-macroglobulin                                             |
| P20742 PZP_HUMAN                         | 40.46        | 1        | 163862   | Pregnancy zone protein                                            |
| P26436 ASPX_HUMAN                        | 29.37        | 2        | 28156    | Acrosomal protein SP-10                                           |
| P52306 GDS1_HUMAN                        | 29.37        | 1        | 66317    | Rap1 GTPase-GDP dissociation stimulator 1                         |
| P35555 FBN1_HUMAN                        | 29.37        | 0        | 312297   | Fibrillin-1                                                       |
| P61026 RAB10_HUMAN                       | 29.34        | 2        | 22541    | Ras-related protein Rab-10                                        |
| Q13888 TF2H2_HUMAN                       | 29.34        | 1        | 44419    | General transcription factor IIH subunit 2                        |
| O43323 DHH_HUMAN                         | 29.34        | 1        | 43577    | Desert hedgehog protein                                           |
| P02787 TRFE_HUMAN                        | 29.34        | 1        | 77064    | Serotransferrin                                                   |

---

|                    |       |   |        |                                                                |
|--------------------|-------|---|--------|----------------------------------------------------------------|
| Q9Y239 NOD1_HUMAN  | 29.34 | 1 | 107691 | Nucleotide-binding oligomerization domain-containing protein 1 |
| Q92797 SYMPK_HUMAN | 29.34 | 0 | 141148 | Symplekin                                                      |
| Q7Z460 CLAP1_HUMAN | 27.82 | 0 | 169450 | CLIP-associating protein 1                                     |
| O43422 P52K_HUMAN  | 25.30 | 1 | 87704  | 52 kDa repressor of the inhibitor of the protein kinase        |
| Q9BZ29 DOCK9_HUMAN | 25.30 | 0 | 236444 | Dedicator of cytokinesis protein 9                             |
| Q8WVD5 RN141_HUMAN | 25.07 | 2 | 25535  | RING finger protein 141                                        |
| Q9H2P9 DPH5_HUMAN  | 25.07 | 2 | 31651  | Diphthine methyl ester synthase                                |
| Q9NU02 ANKE1_HUMAN | 25.07 | 1 | 86664  | Ankyrin repeat and EF-hand domain-containing protein 1         |
| Q8TF40 FNIP1_HUMAN | 25.07 | 0 | 130555 | Folliculin-interacting protein 1                               |
| Q6ZUT9 DEN5B_HUMAN | 25.07 | 0 | 145019 | DENN domain-containing protein 5B                              |
| Q86XX4 FRAS1_HUMAN | 25.07 | 0 | 443217 | Extracellular matrix protein FRAS1                             |
| Q8NEZ4 KMT2C_HUMAN | 20.35 | 0 | 541376 | Histone-lysine N-methyltransferase 2C                          |

---
